# Supplementary material for: Distinct genetic bases for plant root responses to lipo-chitooligosaccharide signal molecules from distinct microbial origins
Source: bioRxiv or medRxiv preprint supplement (doi:10.1101/2020.09.09.285668), 2020-09-10
Supplement: Supplementary file [file media-1.pdf]

« Fung - LCOs »

Fucosylated or methyl-fucosylated (1:1 ratio)

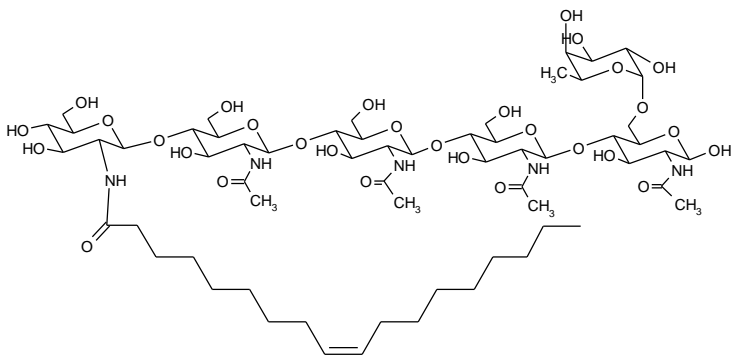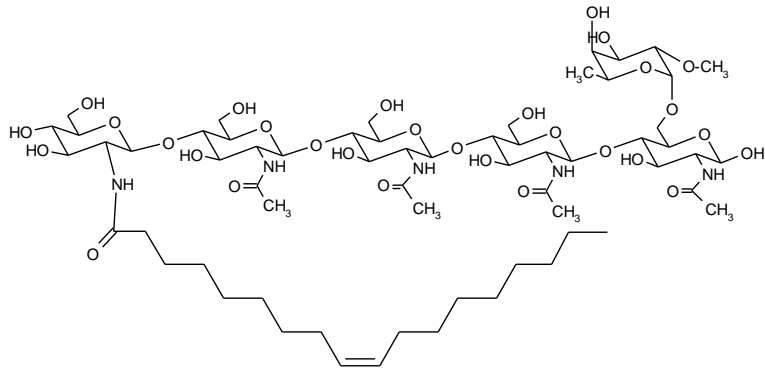

Nod-LCOs from *Sinorhizobium meliloti*:

sulphated and acetylated

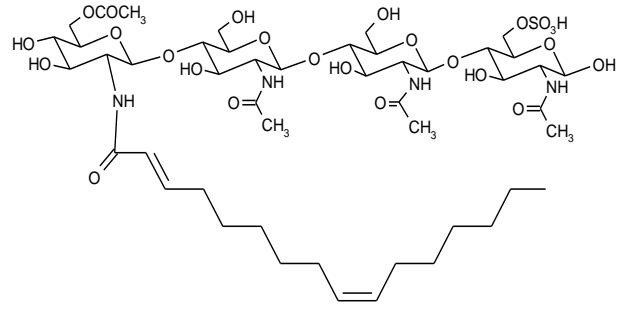

« Myc - LCOs »

Non sulfated or sulfated

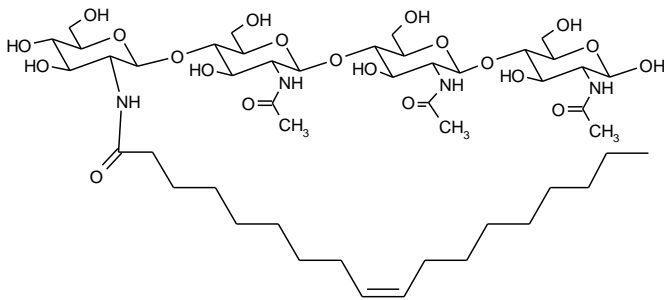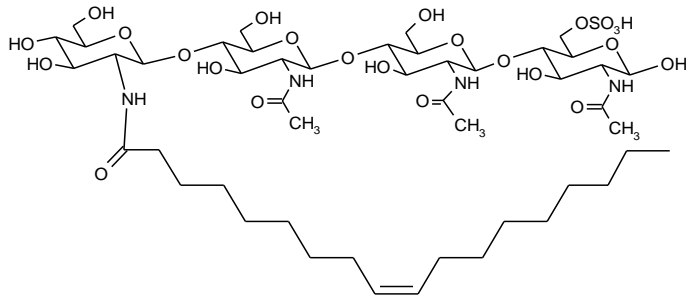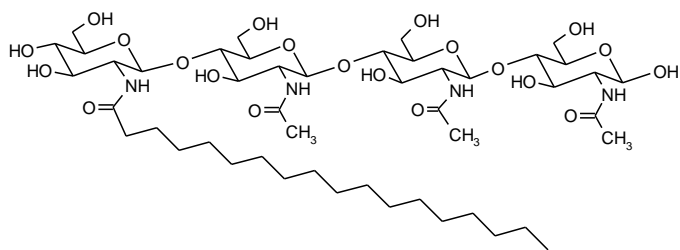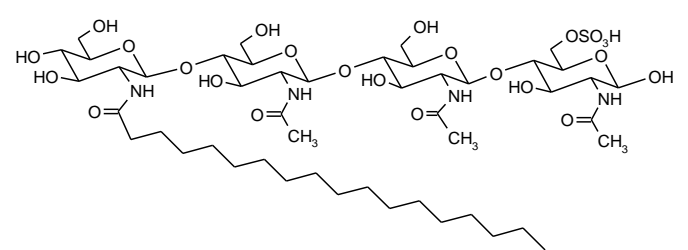

Fig. S1

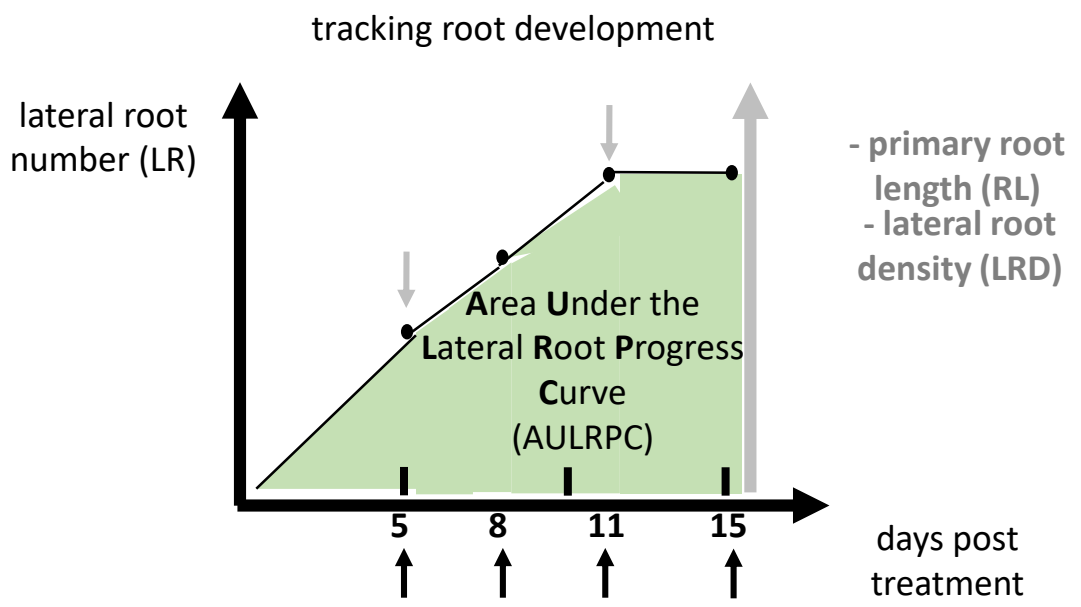

Fig. S2
